# Supplementary material
Source: Elsevier journal article supplement (https://www.sciencedirect.com/science/article/pii/S0001731022002125)
Supplement: mmc1 [file S0001731022002125:mmc1.pdf]

## Resultados en relación al periodo preconcepcional

**Tabla S1.** Elementos que se comentan cuando se ofrece consejo preconcepcional\*.

| Variable                                                                                                                                                                              | Resultado   |
|---------------------------------------------------------------------------------------------------------------------------------------------------------------------------------------|-------------|
| Consejo genético (heredabilidad de la psoriasis)                                                                                                                                      | 13 (27,08%) |
| Impacto de la psoriasis y su tratamiento en la fertilidad                                                                                                                             | 24 (50,00%) |
| Uso de contraceptivos                                                                                                                                                                 | 28 (58,33%) |
| Impacto de la psoriasis y sus tratamientos (así como el riesgo de no tratarse) en el embarazo (para la madre y feto) y posparto                                                       | 40 (83,33%) |
| Impacto del embarazo y posparto en la psoriasis                                                                                                                                       | 33 (68,75%) |
| Planificación del embarazo (justificación, alternativas y modificaciones del tratamiento antes de la concepción y durante el embarazo, calendario de visitas, pruebas, vacunas, etc.) | 38 (79,17%) |
| Medidas en el puerperio y la lactancia                                                                                                                                                | 15 (31,25%) |
| Manejo del embarazo no previsto                                                                                                                                                       | 13 (27,08%) |

\* Los resultados se expresan en n y porcentaje (%).

**Tabla S2.** Planificación del embarazo e información al paciente\*.

| Variable                                                                                                                            | Resultado   |
|-------------------------------------------------------------------------------------------------------------------------------------|-------------|
| Tipos de pacientes en los que se planifica el embarazo                                                                              |             |
| En pacientes con tratamientos tópicos                                                                                               | 2 (4,17%)   |
| En pacientes con tratamiento sistémico                                                                                              | 31 (64,58%) |
| En pacientes con formas leves                                                                                                       | 1 (2,08%)   |
| En pacientes con formas moderadas o graves                                                                                          | 25 (52,08%) |
| En pacientes con comorbilidades u otras circunstancias que pueden suponer un riesgo en el embarazo                                  | 20 (41,67%) |
| Cuando el paciente lo solicita                                                                                                      | 29 (60,42%) |
| No planifico el embarazo, actúo cuando me lo comunican                                                                              | 3 (6,25%)   |
| Uso de protocolos, documentos, guías cuando se informa a los pacientes sobre el consejo reproductivo y/o planificación del embarazo | 18 (37,50%) |
| Uso de otros formatos (además del verbal) para informar sobre la concepción, el embarazo, la lactancia                              | 3 (6,25%)   |

\* Los resultados se expresan en n y porcentaje (%).

**Tabla S3.** Aspectos considerados importantes en relación a un posible embarazo\*.

| Variable                                                            | Resultado   |
|---------------------------------------------------------------------|-------------|
| El control de la actividad de la psoriasis en los últimos años      | 21 (43,75%) |
| El control de la actividad de la psoriasis en los 3-4 últimos meses | 20 (41,67%) |
| La gravedad de la psoriasis                                         | 40 (83,33%) |
| El tratamiento con fármacos sistémicos incluyendo los biológicos    | 45 (93,75%) |
| El tratamiento con fármacos sistémicos excluyendo los biológicos    | 9 (18,75%)  |

|                                                                                                                                                                                                                             |             |
|-----------------------------------------------------------------------------------------------------------------------------------------------------------------------------------------------------------------------------|-------------|
| El tratamiento con fármacos tópicos                                                                                                                                                                                         | 13 (27,08%) |
| La presencia de comorbilidades                                                                                                                                                                                              | 32 (66,67%) |
| La historia ginecológica-obstétrica de la paciente                                                                                                                                                                          | 32 (66,67%) |
| Las contraindicaciones absolutas y relativas del embarazo                                                                                                                                                                   | 32 (66,67%) |
| La información sobre posibles complicaciones del embarazo, la evolución de la psoriasis durante el embarazo, el plan de actuación ante complicaciones del embarazo o brotes de la psoriasis, calendario de revisiones, etc. | 38 (79,17%) |

\* Los resultados se expresan en n y porcentaje (%).

## Embarazo y seguimiento de la paciente con psoriasis

**Tabla S4.** Distintos aspectos sobre el embarazo en las pacientes con psoriasis\*.

| Variable                                                                                                                            | Resultado   |
|-------------------------------------------------------------------------------------------------------------------------------------|-------------|
| Necesidad de tener la psoriasis controlada para quedarse embarazada ( <u>antes</u> del embarazo)                                    |             |
| Sí, que esté en remisión                                                                                                            | 3 (6,38%)   |
| Sí, que esté con la menor actividad posible                                                                                         | 32 (68,09%) |
| En general que no esté muy activa                                                                                                   | 1 (2,13%)   |
| La actividad no influye para que una mujer se quede embarazada                                                                      | 3 (6,38%)   |
| Controlar la actividad en la práctica diaria es difícil dado que un porcentaje de pacientes se quedan embarazadas sin planificación | 6 (12,77%)  |
| No lo sé                                                                                                                            | 0 (0,00%)   |
| Necesidad de tener la psoriasis controlada <u>durante</u> el embarazo                                                               |             |
| Sí, que esté en remisión                                                                                                            | 4 (8,70%)   |
| Sí, que esté con la menor actividad posible                                                                                         | 37 (80,43%) |
| En general que no esté muy activa                                                                                                   | 2 (4,35%)   |
| La actividad no influye en el desarrollo del embarazo                                                                               | 1 (2,17%)   |
| Controlar la actividad en la práctica diaria durante el embarazo es difícil                                                         | 0 (0,00%)   |
| No lo sé                                                                                                                            | 1 (2,17%)   |
| Protocolo, documento, guía específico para el manejo de pacientes durante el embarazo                                               | 11 (23,40%) |
| Modificaciones en el seguimiento de la paciente una vez se queda embarazada                                                         |             |
| Sí, prácticamente siempre                                                                                                           | 30 (63,83%) |
| Normalmente no                                                                                                                      | 8 (17,02%)  |
| Solo cuando existe tratamiento sistémico                                                                                            | 8 (17,02%)  |
| Uso de otros formatos (además del verbal) para informar sobre el embarazo                                                           | 2 (4,26%)   |

\* Los resultados se expresan en n y porcentaje (%).

**Tabla S5.** Cómo se realiza el seguimiento en las pacientes con psoriasis embarazadas\*.

| Variable                                                                                                                                            | Resultado   |
|-----------------------------------------------------------------------------------------------------------------------------------------------------|-------------|
| Aumento de la frecuencia de las visitas                                                                                                             | 20 (42,55%) |
| Disminución la frecuencia de las visitas, ya que el seguimiento lo realizan básicamente los ginecólogos, la unidad de embarazo de alto riesgo, etc. | 2 (4,26%)   |
| Evaluación de manera sistemática los factores de riesgo del embarazo y otras complicaciones                                                         | 10 (21,28%) |
| Evaluación el tratamiento de la paciente y modifíco si procede                                                                                      | 37 (78,72%) |
| Modifíco el seguimiento analítico (frecuencia, parámetros...)                                                                                       | 2 (4,26%)   |
| Comentar activamente con la paciente la eficacia y seguridad de los fármacos a utilizar (incluyendo efectos teratogénicos de los mismos)            | 35 (74,47%) |
| Comentar activamente con la paciente el efecto del embarazo en la psoriasis y viceversa                                                             | 38 (80,85%) |
| Comentar activamente con la paciente las posibles complicaciones materno-fetales del embarazo en su caso                                            | 22 (46,81%) |
| Otros                                                                                                                                               | 4 (8,51%)   |

\* Los resultados se expresan en n y porcentaje (%).

**Tabla S6.** Actuaciones en caso de brote de psoriasis extenso en una mujer embarazada que ha suspendido el tratamiento y su graduación de 1 (pocas veces lo/s uso en estos casos) a 5 (recorro con mucha frecuencia a este/estos fármacos)\*.

| Fármaco              | Uso en caso de brote | Frecuencia de uso <sup>†</sup> |
|----------------------|----------------------|--------------------------------|
| Tratamientos tópicos | 43 (93,47%)          | 3,60±2,83                      |
| Fototerapia UVB      | 44 (95,65%)          | 4,19±2,82                      |
| Ciclosporina A       | 41 (89,13%)          | 2,95±2,82                      |
| Terapias biológicas  | 44 (95,65%)          | 3,52±2,58                      |

\* Los resultados se expresan en n y porcentaje (%) a no ser que se indique otra cosa.

<sup>†</sup> Media ± desviación estándar.

## Posparto, lactancia y cuidado perinatal

**Tabla S7.** Distintos aspectos sobre el posparto, lactancia y su seguimiento en las pacientes con psoriasis\*.

| Variable                                                                    | Resultado   |
|-----------------------------------------------------------------------------|-------------|
| Tras parto vuelta al seguimiento habitual del paciente                      | 44 (93,62%) |
| Tras el parto, cómo se realiza seguimiento                                  |             |
| Aumento la frecuencia de las visitas                                        | 13 (27,66%) |
| Disminuyo su frecuencia al menos al principio                               | 4 (8,51%)   |
| Evalúo sistemáticamente el riesgo de recaída en muchas pacientes            | 25 (53,19%) |
| Evalúo sistemáticamente el tratamiento de la paciente y modifíco si procede | 34 (72,34%) |

|                                                                                                                                                                                                        |             |
|--------------------------------------------------------------------------------------------------------------------------------------------------------------------------------------------------------|-------------|
| Modifico el seguimiento analítico (frecuencia, parámetros...)                                                                                                                                          | 1 (2,13%)   |
| Comento activamente con la paciente la eficacia y seguridad de los fármacos a utilizar (incluyendo sus efectos sobre la lactancia)                                                                     | 34 (72,34%) |
| Recomendar lactancia materna                                                                                                                                                                           |             |
| No, está contraindicada                                                                                                                                                                                | 0 (0,00%)   |
| En general sí                                                                                                                                                                                          | 41 (81,13%) |
| En general lo dejo en manos de los pediatras                                                                                                                                                           | 2 (4,35%)   |
| Protocolo, documento, guía específico para el manejo de pacientes durante la lactancia                                                                                                                 | 17 (36,17%) |
| Uso de otros formatos (además del verbal) para informar sobre la lactancia                                                                                                                             | 4 (8,51%)   |
| Recomendación de cuidado perinatal especial para niños nacidos de madres que han estado con terapias biológicas en algún momento del embarazo                                                          |             |
| Sí                                                                                                                                                                                                     | 18 (39,13%) |
| No                                                                                                                                                                                                     | 8 (17,39%)  |
| Lo que considere el pediatra                                                                                                                                                                           | 17 (36,96%) |
| Seguimiento de alguna actitud concreta en recién nacidos de madres expuestas a terapias biológicas (que cruzan la barrera placentaria durante todo el embarazo o al menos durante el último trimestre) |             |
| Sí                                                                                                                                                                                                     | 22 (47,83%) |
| No                                                                                                                                                                                                     | 3 (6,52%)   |
| Lo que considere el pediatra                                                                                                                                                                           | 15 (32,61%) |

\* Los resultados se expresan en n y porcentaje.

## Barreras y facilitadores a la implementación de las recomendaciones del GPS

**Tabla S8.** Facilitadores más implementables actualmente en la práctica diaria.

| Variable                                                                                 | Respuesta   |
|------------------------------------------------------------------------------------------|-------------|
| Apoyo de enfermería                                                                      | 17 (36,17%) |
| Mayor comunicación entre especialidades                                                  | 6 (12,77%)  |
| Mayor formación específica entre dermatólogos                                            | 4 (8,51%)   |
| Generación de materiales específicos                                                     | 11 (23,40%) |
| Opinión de pacientes / asociaciones de pacientes                                         | 1 (2,13%)   |
| Proyectos de investigación específicos, registros de investigación específicos           | 4 (8,51%)   |
| Generación de protocolos consensuados locales                                            | 4 (8,51%)   |
| Mayor apoyo de las nuevas tecnologías (videollamadas, historia médica electrónica, etc.) | 0 (0,00%)   |

\* Los resultados se expresan en n y porcentaje.
